# Supplementary material for: PgMYB1 Positively Regulates Anthocyanin Accumulation by Activating PgGSTF6 in Pomegranate
Source: MDPI journal article supplement (doi:10.3390/ijms24076366), 2023-03-28
Supplement: s1 [file s1]

Figure S1 Comparison between amino acid sequences of PgMYB1 and their close homologs in plant species.

Figure S2 Comparison between PgGSTFs and their close homologs in plant species. Comparison of amino acid sequences of 18 PgGSTFs with their close homologs.

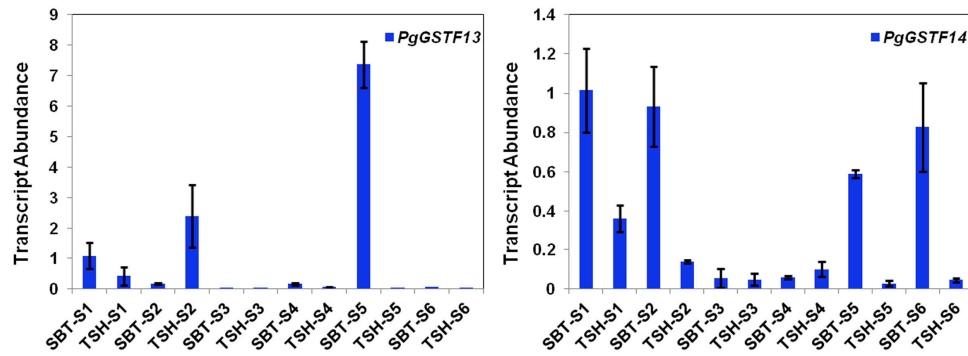

Figure S3 Expression pattern of *PgGSTF13* and *PgGSTF14* in different developmental stages of TSH and SBT. qRT-PCR analysis of *PgGSTF13* and *PgGSTF14* expression in different developmental stages of TSH and SBT. Error bars indicate  $\pm$  SD (n=3, from three technical replicates). Values in Fig. S3 were derived from experiments that were performed at least three times with similar results, and representative data from one repetition were shown.



*proPgGSTF6*

AGGAGAAGATGACGAGGACGAGGAAGGATGAAAGGAACCTCTAAGAGCAGTGAATCGAGCAG  
AAAGATCATCGCCTAGGACGGTGTTTCAGCTCGTCGTCACCTTGAGGCGGAGGAGGTGAGGGT  
TTTGGTCTGAGAGGGGATGGAGTCGGGGGAGGAGATTTGAGAGCTTGAAGTAGCGAGAGA  
GATCGATGATTGAGGGAATGAAAAGTAGTGCGGGCTACGTGGGAGTTGAAGGAAAGCTTCAA  
AAGGACATCGTCATGTGCGGCCTGCAGAAGCTGTTCCACTTCATCCATACCTGAAGGTGGATT  
TCCGAGGGTCGGAGGGGGAGGTAATTGAGCAAGCCCTGAAACTCCATCTCCAAAAGGGAAAT  
GACGAGGCATGAGTAGTTGGGATGAGGGAAGGTTTCCTCCTTTTTCTGGAGAAAAACGGGAT  
GAAGTAGGGGCTGGAAGTAGCCGAGATTCACCGCAGGGGCAGATTGGAGAGAAGCTGAGC  
GAGAAATGGAAGCTCGCATAAGGATAGGAAGAGGAAGAGGAAGACAAAGGAGAGGAAATTCA  
TTTGAATTGGGACTGTGGGACGAAAGAGAAGGGGAAAGAGTGAGAGAATGAGAGAGAGAAG  
GCATAGAAAGAAGATGATAATTTGAAGTTACATTAATTTGCCCAGCCATTACATCGATTCACTCT  
CTGAACAAATTAACGGAACAATAACGCTATCTGCCCTTAGCCACTCAGACTAGATTGATGTAAC  
CGGTGATTGATCTAATGTAACGCTACAACCTCAAGGACTTGTTGTTGCGAAAGTCGGGAACTAAAT  
TGATGTAACCGAGCAAAGTCGAGGACCAATTTTATGTAACCGAAAAGTTATTGACGAAATTGAT  
GCAAAAGTGCAAAAGTCGGGGACGAAATTGATGCAAAATATAAGTCGGGAATGAAATTGCCTATT  
TACTCATGTATGATTGAACAAGTGCGACCATTGTGCCTTTGAAATTAAATTGTGGAATATACAAAA  
GGTCGATTGTTGGCTCGTACAAAAGTTTTGTATGTAATGGATATATCAAGTGTCATTATGTGATAAG  
ATATACTAAAACTATTTTTAACATGTCATAAATTTGTAATAACGCGTATTGATGTATTGAACACC  
AATTAGTTTATGATACAAGTTGCATAATATAATCATTACATATAAGATTTTCTCGTTGGCTGAGGAT  
TATATTTTTGTAAGTGTGCTTAATCAATGAGGAACGCAATATAGATTTTCCTTATTTTCGATGCGTC  
ACTACATGGAAAATTCATAATGTAATCACTTTTTTATTTGTGCAATTATTTTGAATCATAAAATTATA  
ATTATTAATAAATAAATAAAT**CTGTTG**ATTATTCAACGATTAAAAAGCTGATTGCCCCGTACAATTA  
CTTGTAATATAGACCTTCCAATCACTGTACCCATTTAAATTAATATTTTTGGAGAGCGGGGCAA  
GCCAACCGCCGGTAGACGAGGCGCATGTGATAACCCCCGCGGATTGCTGCAACTAACTGCAA  
CTACATGATTTTATTATGTAATTATTTTGC GCGGCTGTATATGCATCTGAATTGAGACTGGTCAGA  
GAAGAGAGGCGTGCGCGCACTGACCCACAGTCAAGTCCAGATAGTCAGTGAGTGTAATTTT  
CTATAAATAAATAACAATCAATTAATACTTATAAATACCAATATATAATTTTATTGTGAGCGAATTT  
CTGAATTTCTGAATTTGATAGGTACCCATTGACTGGTCCCGGTGAATTTCAACGGTTGTCGGTT  
GGGTCTGGGTCGAGACAGATCTCACGTGGCAACCCCCACCCGTCGTAGACAAAATCACACTT  
CAGTATACATATTTATATATATGTGTGTGTGTGTGTCTGTGCAGCAGAAATCAGATCCCCAACT  
AGCCTGCACTGTCTTAGCTAGCTAGCTGCTGGGTGGGATATATTAAATTTTCATCCAAAATTAATA  
GATCAGATCCCC

Figure S4 PgMYB1 may be able to bind to the *cis*-element of CTGTTG in the promoter region of *PgGSTF6*. Promoter sequence of *PgGSTF6*. PgMYB1 recognition site in promoter region of *PgGSTF6* is highlighted in bold with red color.
