# Supplementary material for: PgMYB1 Positively Regulates Anthocyanin Accumulation by Activating PgGSTF6 in Pomegranate
Source: Int J Mol Sci. 2023 Mar 28;24(7):6366. doi: 10.3390/ijms24076366 (PMC10094570; doi:10.3390/ijms24076366)
Supplement: Supplementary file 1 [file ijms-24-06366-s001.zip › Table S1.xlsx]

## Sheet: Sheet2
Table S1. The primers used in this study.
Primer	Sequence (5'-3')	Notes
AD-PgMYB1-F	GGCCATTACGGCCATGGAGATCGAAATGCACACTG(Sfil)	pGADT7
AD-PgMYB1-R	GGCCGAGGCGGCCCTAGGTTGACAGCACATTCGCC(Sfil)
PgPgMYB1-F	GTCCAAGACCAGATGCCC	qRT-PCR
PgPgMYB1-R	CTACCCTCCTCTGGATGC
PgANS-F	GACACAATCGAGATCCTC	qRT-PCR
PgANS-R	CGATATGCTGGGCAAAGG
PgDFR-F	ACCTATGCATGTCCCACATATT	qRT-PCR
PgDFR-R	GTACTTCTCCCTTAGGAGCTTTG
PgF3H-F	ACCTATTTCGCGTACCCAATC	qRT-PCR
PgF3H-R	CATCAGCTTCTCGCTGTACTC
PgUFGT-F	TCTGGTTCGCTGAGGAGATA	qRT-PCR
PgUFGT-R	TGAGGAGGTCAGTGTAGAGATG
PgCHI-F	CAGGTCGAGTCGTTCACTTT	qRT-PCR
PgCHI-R	CCTCAATTTCCAGCCCTCTC
PgCHS-F	GTCGAAGATCACCCATCTCATC	qRT-PCR
PgCHS-R	CATCCCTGCTGGTACATCATAA
PgGSTF6-F	GACGGTGACTTACGGCTATTT	qRT-PCR
PgGSTF6-R	CATTGGTCTACCATCGCTCTC
PgGSTF9-F	CTCGAGAAAGACGTGGAGTTC	qRT-PCR
PgGSTF9-R	TCTTGGAAAGCAGGGACTTG
PgGSTF13-F	AGCAGTTCAATCCGGTGATAAA	qRT-PCR
PgGSTF13-R	CTTCTCCAGGTTCTCGTCAATG
PgGSTF14-F	TCCTAGACGTTTACGAGGAGAG	qRT-PCR
PgGSTF14-R	CCAGGTATGGGATGTGGTTAAG
Actin-F	GTGCCCATCTATGAGGGTTATG	qRT-PCR
Actin-R	ATTTCCCGTTCAGCAGTAGTT
PgMYB1-F	GAATTCGGCCCTGAACCAGCTTCTTCATTT(EcoRI)	VIGS
PgMYB1-R	GGTACCCTAGGTTGACAGCACATTCGCCATC(KpnI)
ProPgGSTF6-F	GAATTCAGGAGAAGATGACGAGGACGAGGAAG(EcoRI)	pHIS2
ProPgGSTF6-R	GAGCTCGGGGATCTGATCTTTTAATTTTGG(SacI)
proPgGSTF6MBS-F	GAATTCTTAATAAATAAATAAATCCTGTTGATTATTCAACGATTAAAA	pHIS2
proPgGSTF6MBS-R	GAGCTCTTTTAATCGTTGAATAATCAACAGGATTTATTTATTTATTAA
proPgGSTF6MBSmutant-F	GAATTCTTAATAAATAAATAAATCCGGTGGATTATTCAACGATTAAAA	pHIS2
proPgGSTF6MBSmutant-R	GAGCTCTTTTAATCGTTGAATAATCCACCGGATTTATTTATTTATTAA
35S:PgMYB1-F	GTCGACATGGAGATCGAAATGCACACTGACG(SalI)	Gene cloning
35S:PgMYB1-R	GGTACCCTAGGTTGACAGCACATTCGCCATCG(KpnI)	pCAMBIA1300
proPgGSTF6-GUS-F	GTCGACAGGAGAAGATGACGAGGACGAGGAAG(SalI)	Promoter cloning
proPgGSTF6-GUS-R	GGATCCGGGGATCTGATCTTTTAATTTTGG(BamHI)	pCAMBIA1300
35S:PgMYB1-GFP-F	GGTACCATGGAGATCGAAATGCACACTGAC(KpnI)	Gene cloning
35S:PgMYB1-GFP-R	GGATCCGGTTGACAGCACATTCGCCATCG(BamHI)	pRI101
